# Supplementary material
Source: PubMed Central journal article supplement (PMC3208295)
Supplement: supp_blood-2011-02-334870_Document1.pdf [file supp_blood-2011-02-334870_Document1.pdf]

**Figure S1. Antiproliferative effect of tipifarnib in lymphoid cell lines.** **A**, aliquots containing  $1-2 \times 10^4$  cells/ml were incubated with diluent (0.1% DMSO) or the indicated concentration of tipifarnib for 6 d, then assayed for viable cell mass by MTS assay as described in the METHODS. **B**, after treatment with 800 nM tipifarnib for 72 h, cells were stained with propidium iodide and examined by flow cytometry. Cell cycle distribution was assessed using Modfit. Numbers, mean  $\pm$  of 3 independent experiments.

**Figure S2. Role of Bak in tipifarnib-induced apoptosis.** **A, B**, 48 h after introduction of Bax siRNA, Bak siRNA, or both, samples were treated for an additional 48 h with the indicated tipifarnib concentration before staining with APC-conjugated annexin V and analysis by 2-color flow cytometry. **Inset in B**, whole cell lysates were prepared from siRNA-treated cells incubated in drug-free medium until samples were harvested for flow cytometry, then subjected to immunoblotting for the indicated antigens. **C**, after Jurkat cells were treated with the indicated tipifarnib concentration for 48 h, cell lysates prepared in 1% CHAPS<sup>37</sup> were saved for immunoblotting (“input”) or treated with Bak Ab1, which recognizes the active conformation of Bak, cross-linked to protein G-sepharose (“IP”). After immunoprecipitates were washed and resolved by SDS-PAGE, Bak was detected using a conformation-insensitive antibody.

**Figure S3. Characterization of tipifarnib-resistant Jurkat cells.** **A-D**, aliquots containing  $10^3$  parental (open symbols) or tipifarnib-resistant Jurkat cells (closed symbols) were treated for 6 d with the indicated concentrations of tipifarnib (A), lonafarnib (B), or etoposide (C). At the completion of the incubation, samples were assayed for MTS reduction. Error bars, mean  $\pm$  SD of quadruplicate samples. **D**, whole cell lysates prepared from parental Jurkat cells treated for 72

h with diluent (lane 1) or 1600 nM tipifarnib (lane 2) in the presence of 5  $\mu$ M Q-VD-OPh or from tipifarnib-resistant Jurkat cells grown in the continuous presence of 1600 nM tipifarnib (lane 3) were subjected to SDS-PAGE followed by immunoblotting with antibodies to the indicated antigen.

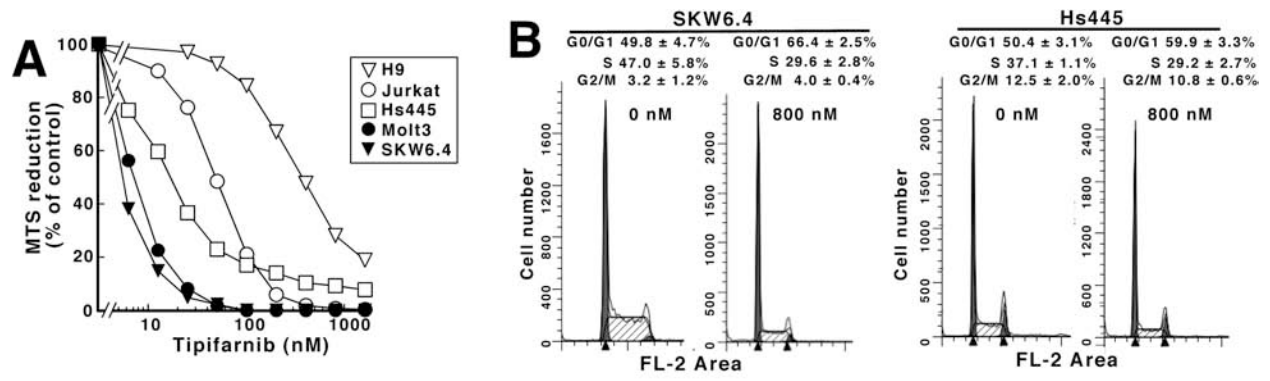

Figure S1

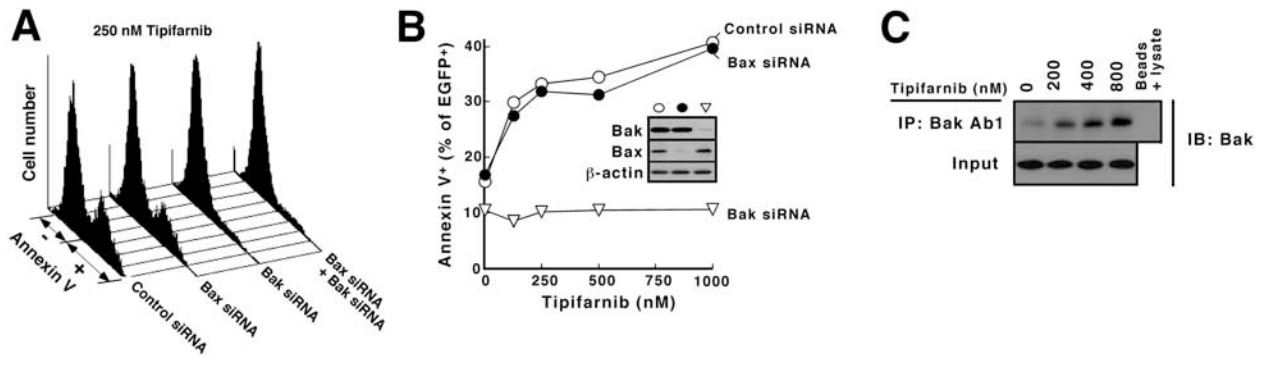

Figure S2

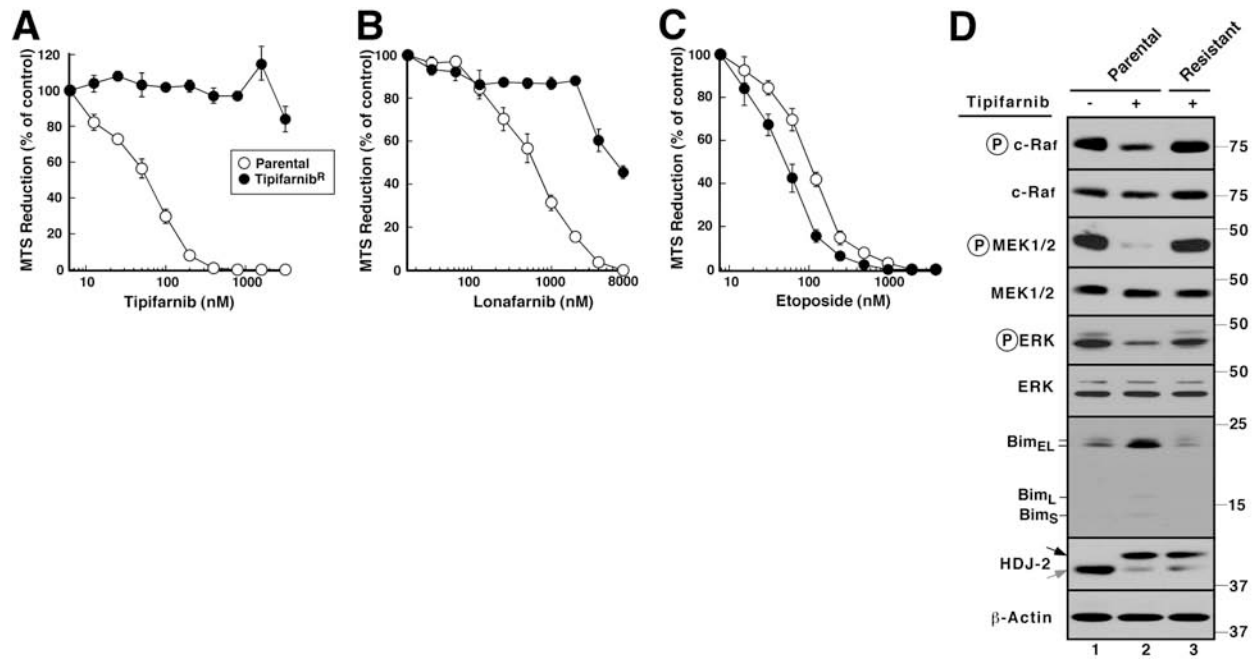

Figure S3
